# Supplementary material for: A label-free and sensitive photoluminescence sensing platform based on long persistent luminescence nanoparticles for the determination of antibiotics and 2,4,6-trinitrophenol
Source: PubMed Central journal article supplement — RSC Adv. 2018 Feb 2;8(11):5714–20. doi: 10.1039/c7ra12222e (PMC9082105; doi:10.1039/c7ra12222e), 2018-02-02
Supplement: RA-008-C7RA12222E-s001.pdf [file RA-008-C7RA12222E-s001.pdf]

## **Electronic Supplementary Information (ESI)**

**for**

### **A Label-Free and Sensitive Photoluminescence Sensing Platform based on Long Persistent Luminescence Nanoparticles for Determination of Antibiotic and 2,4,6-Trinitrophenol**

Xi Zhang<sup>a</sup>, Na-Yan Xu<sup>a</sup>, Qiong Ruan<sup>a</sup>, Dan-Qing Lu<sup>b</sup>, and Yun-Hui Yang\*<sup>a</sup>, Rong Hu\*<sup>a</sup>

a. College of Chemistry and Chemical Engineering, Yunnan Normal University, Yunnan, Kunming 650092, P.R. China

b. Molecular Science and Biomedicine Laboratory, State Key Laboratory of Chemo/Biosensing and Chemometrics, College of Chemistry and Chemical Engineering, Collaborative Innovation Center for Molecular Engineering for Theronastics, Hunan University, Changsha, 410082, China

\*To whom correspondence should be addressed.

E-mail: hudierong\_168@163.com, yyhui2002@aliyun.com

Phone: 86-871-65941087

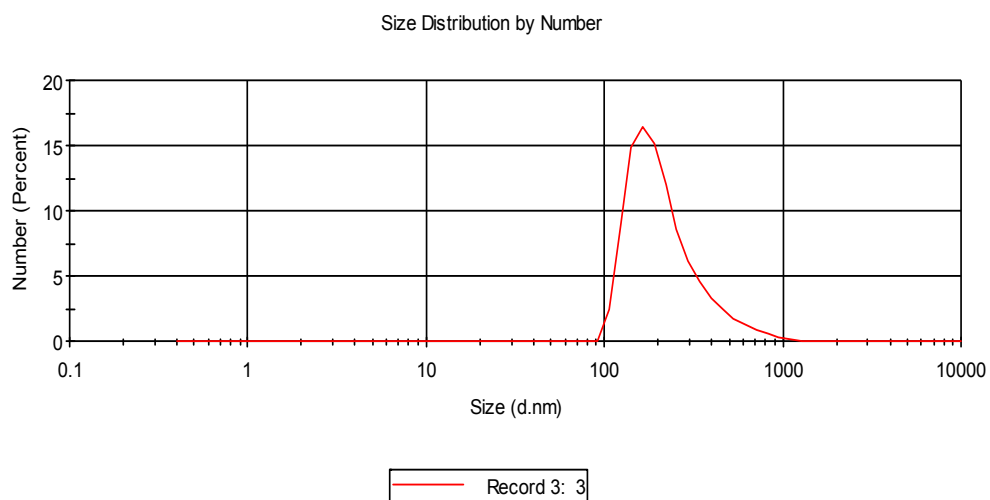

**Figure S1** DLS of the PLNPs

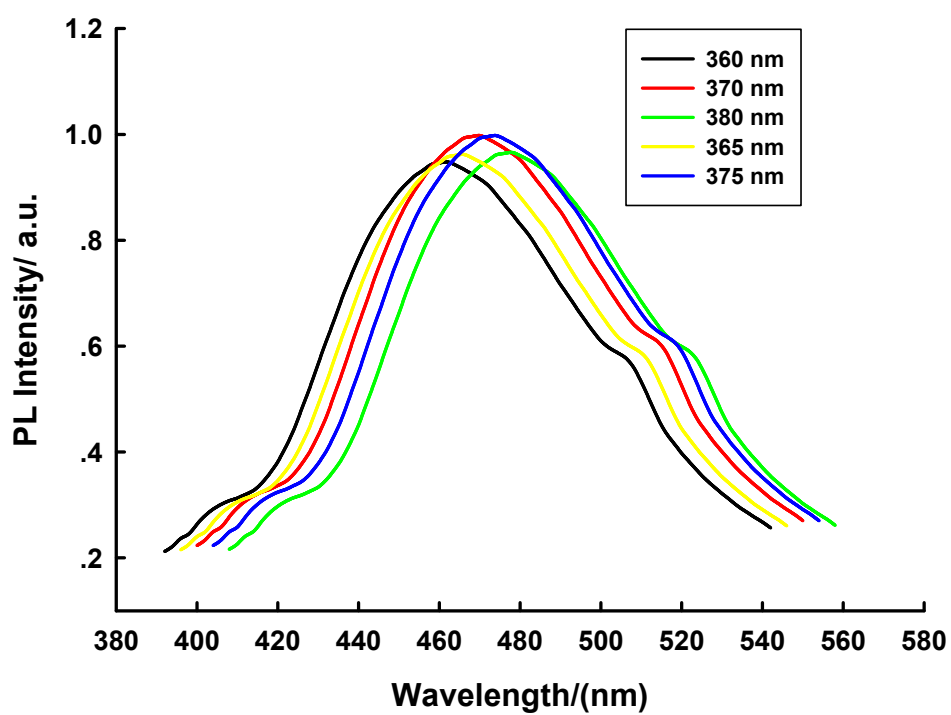

**Figure S2** The emission spectra of the PLNPs under different excitation wavelengths ranging from 300 nm to 370 nm.

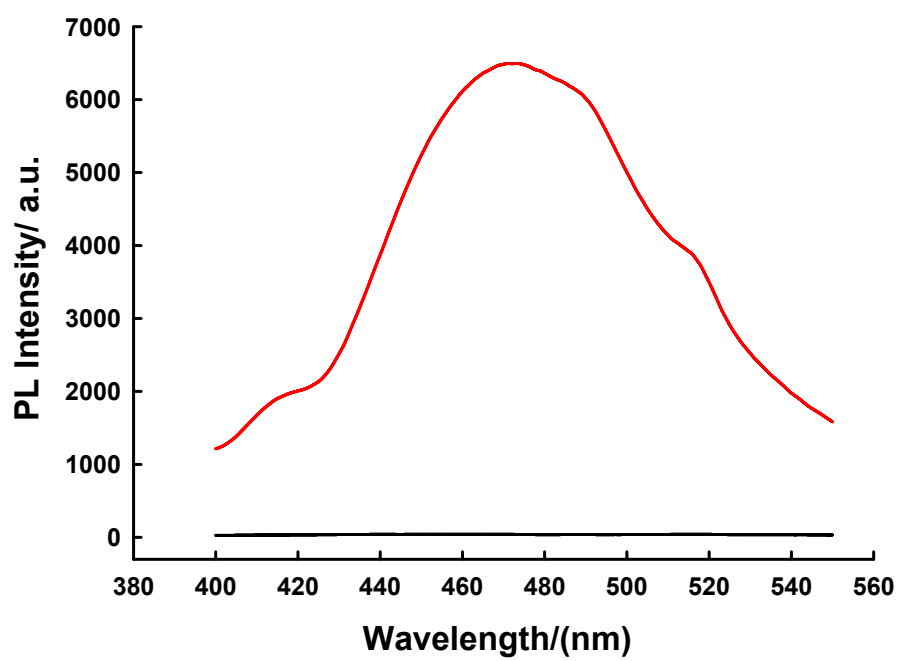

**Figure S3** PL spectra of the biosensor in the presences and absence of antibiotic.

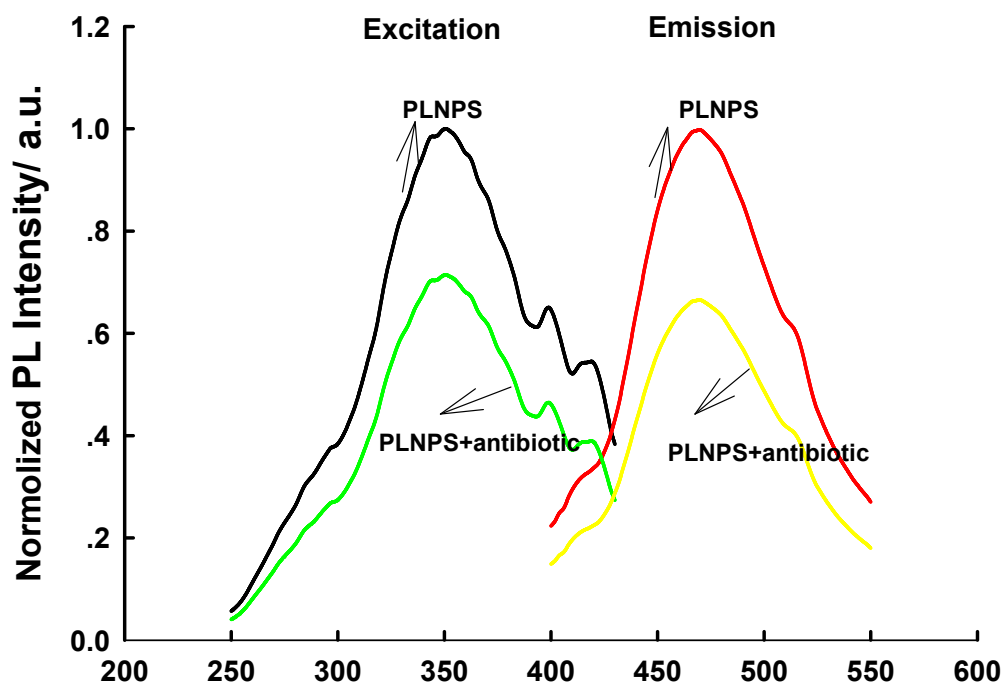

**Figure S4** Photoluminescence excitation and emission spectra of the PLNPs in the presence and absence of 10  $\mu$ M antibiotic.

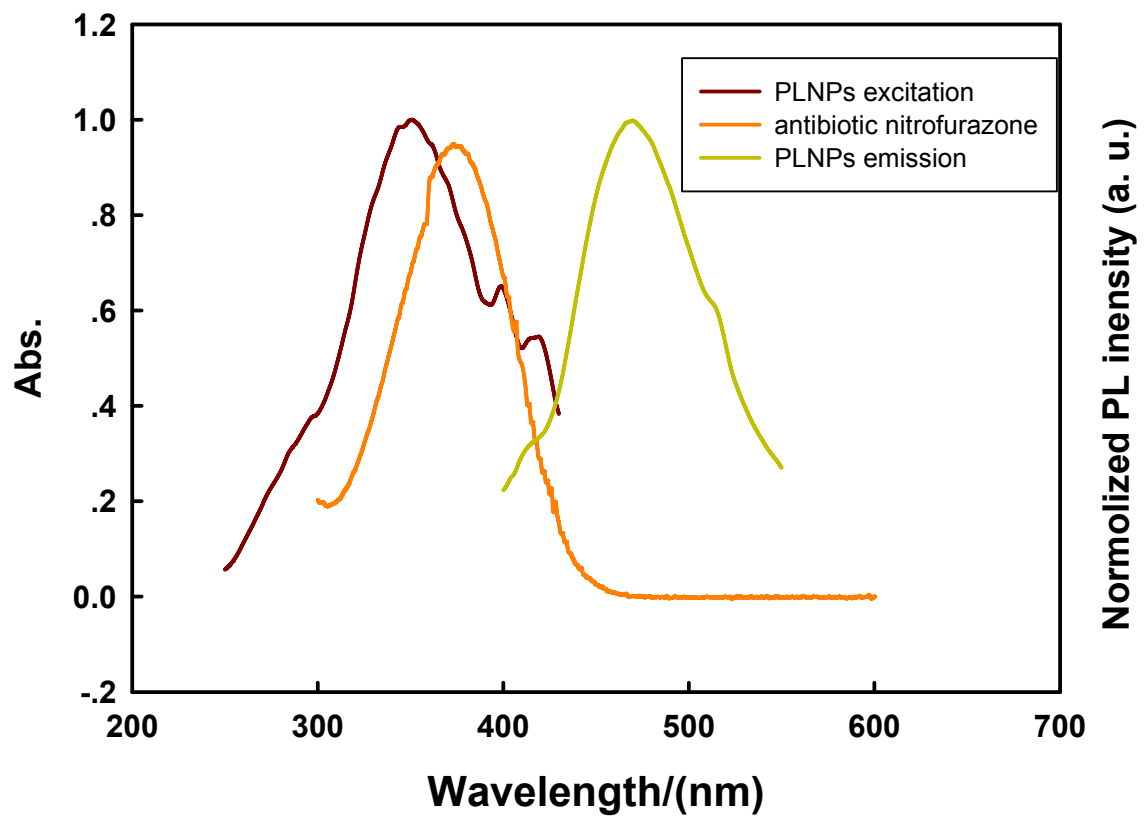

**Figure S5** UV-vis absorption spectrum of antibiotic nitrofurazone and the PL excitation and emission spectra of the PLNPs.

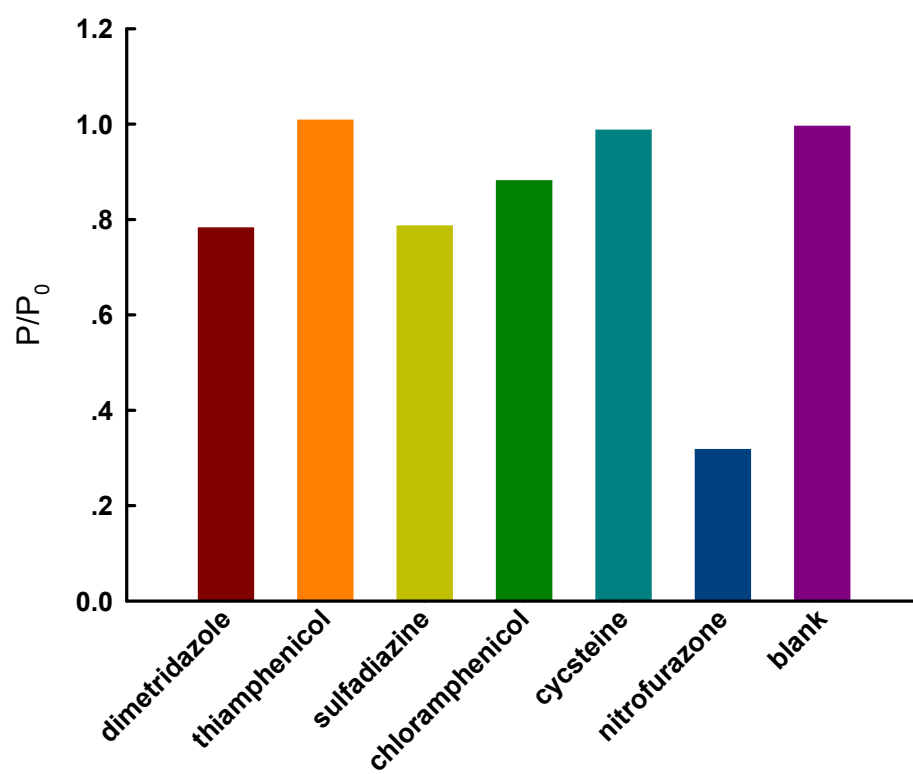

**Figure S6** Selectivity of the PLNPs-based PL sensor for antibiotic.

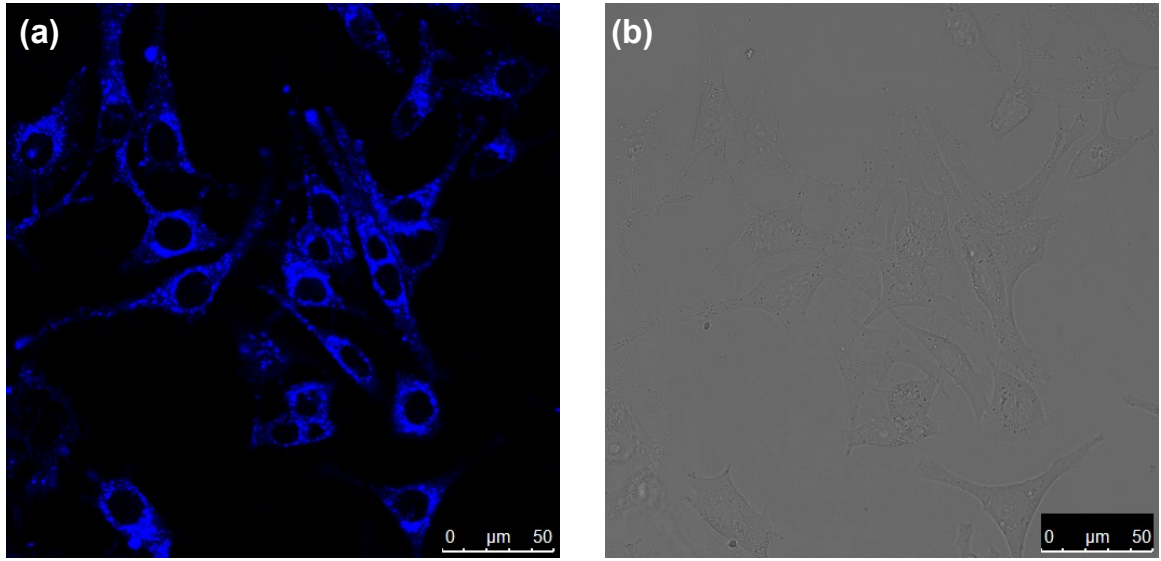

**Figure S7** PL imaging of antibiotic in living cells. PL image of the PLNPs (a) and the bright-field image of the samples in (b).



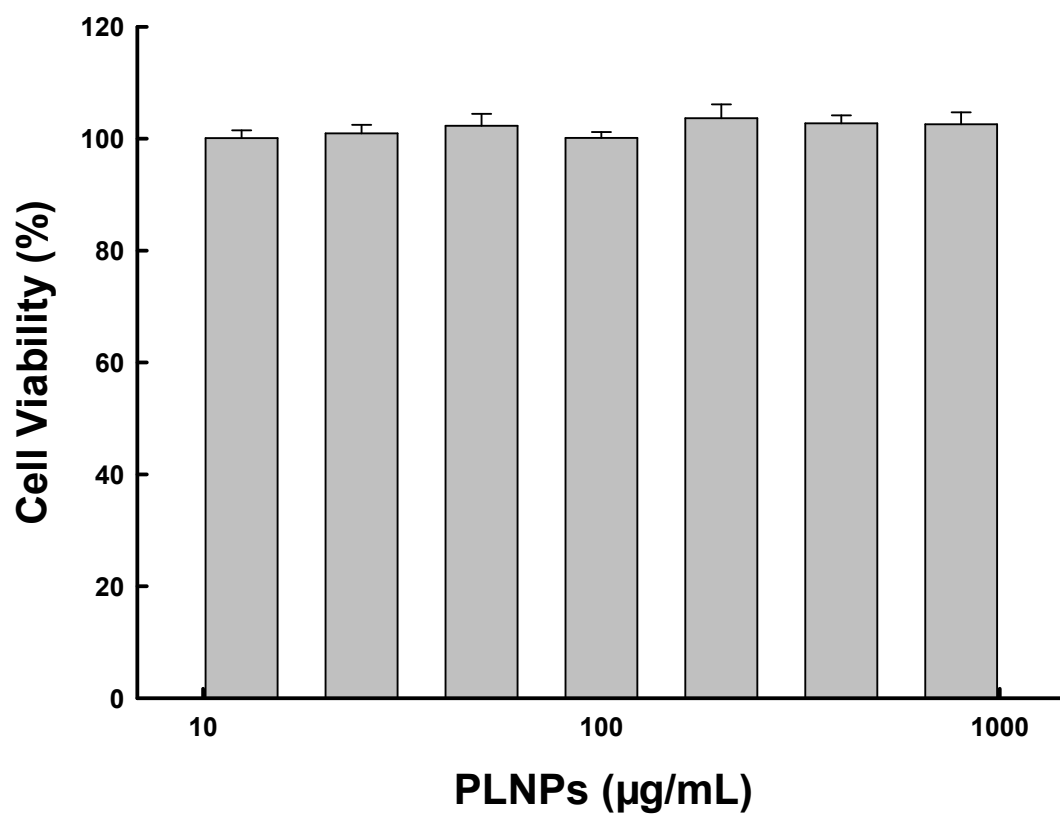

**Figure S8** PL imaging of antibiotic in living cells. PL image of the PLNPs (a) and the bright-field image of the samples in (b).

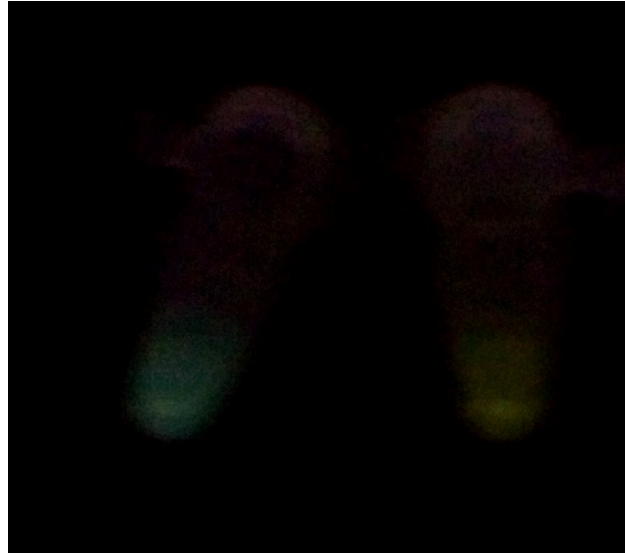

**Figure S9** Photographs of the PLNPs in the absence (left) or presence (right), of the milk solution upon removal of the excitation source after excitation using a UV lamp for 10 min.

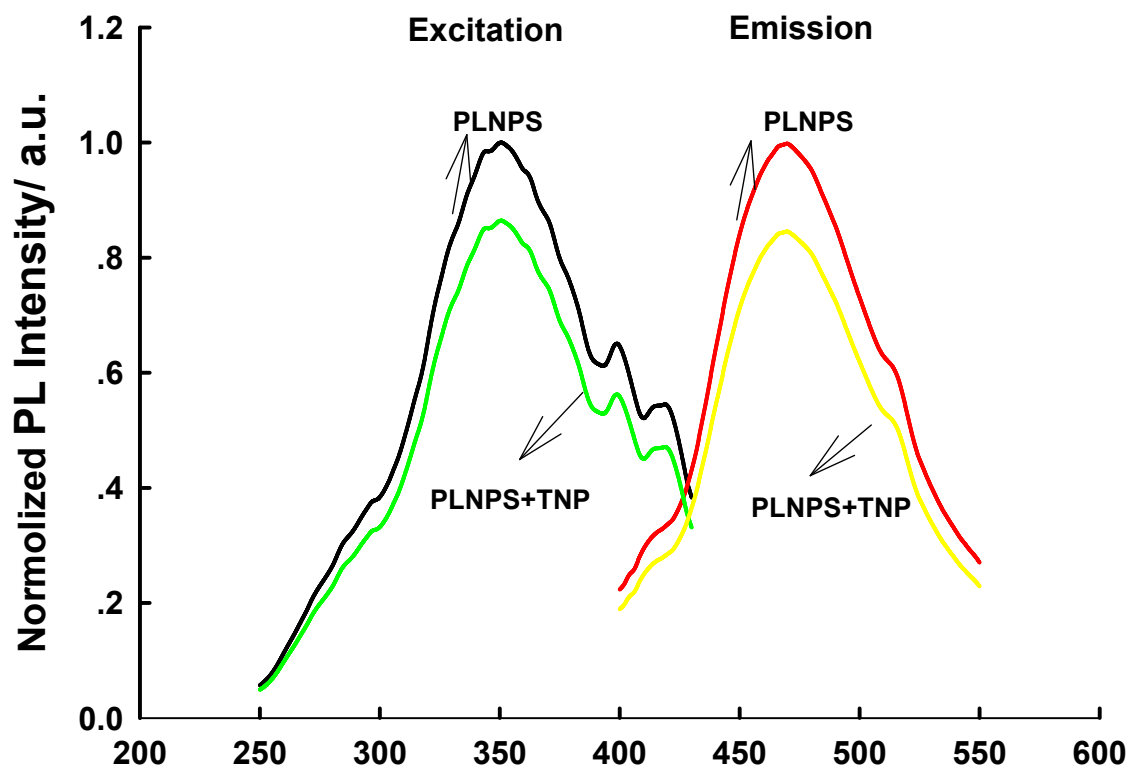

**Figure S10** Photoluminescence excitation and emission spectra of the PLNPs in the presence and absence of 5  $\mu\text{M}$  TNP.

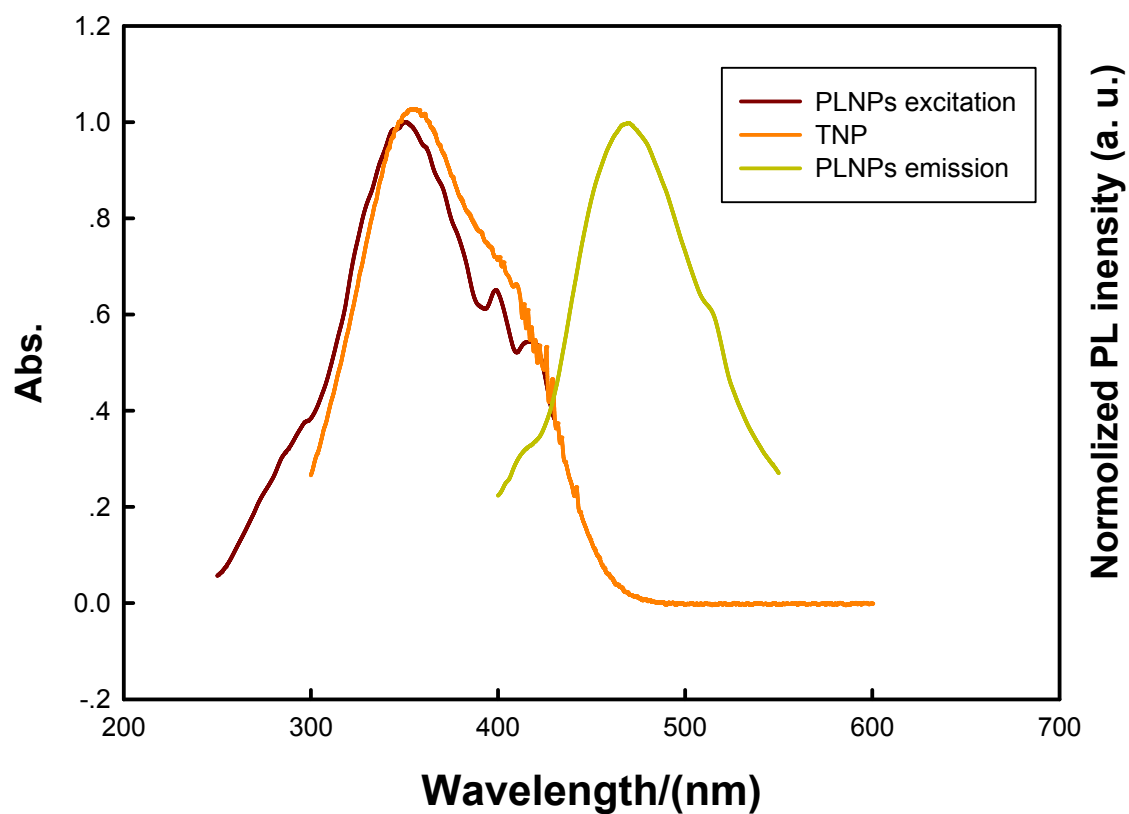

**Figure S11** UV-vis absorption spectrum of TNP and the PL excitation and emission spectra of the PLNPs.

**Table S1. Analytical Performance of Homogeneous Detection Methods**

| <b>Nanomaterial</b>                                                                                                                                                               | <b>Linear Range</b>                         | <b>Detection Limit</b>                | <b>Reference</b>                                          |
|-----------------------------------------------------------------------------------------------------------------------------------------------------------------------------------|---------------------------------------------|---------------------------------------|-----------------------------------------------------------|
| <b>Highly sensitive photoluminescence energy transfer detection for 2,4,6-trinitrophenol using photoluminescent carbon nanodots</b>                                               | 0.08 to 100 mM                              | 22 nM TNP                             | <i>RSC Adv.</i> , 2014, 4, 42066- 42070                   |
| <b>Highly Fluorescent Polyimide Covalent Organic Nanosheets as Sensing Probes for the Detection of 2,4,6-Trinitrophenol</b>                                                       | 0.5 to 10 $\mu$ M                           | 0.25 $\mu$ M TNP                      | <i>ACS Appl. Mater. Interfaces</i> , 2017, 9, 13415–13421 |
| <b>Molybdenum Disulfide Quantum Dots as a Photoluminescence Sensing Platform for 2,4,6-Trinitrophenol Detection</b>                                                               | 0.099 to 36.5 $\mu$ M                       | 95 nM TNP                             | <i>Anal. Chem.</i> 2014, 86, 7463–7470                    |
| <b>A heterometallic sodium–europium-cluster-based metal–organic framework as a versatile and water-stable chemosensor for antibiotics and explosives</b>                          | 1 $\mu$ M to 50 $\mu$ M<br>10 ppm to 60 ppm | 0.8 $\mu$ M antibiotic<br>0.4 ppm TNP | <i>J. Mater. Chem. C</i> , 2017, 5, 8469-8474             |
| <b>One-Pot Synthesis of Fluorescent Silicon Nanoparticles for Sensitive and Selective Determination of 2,4,6-Trinitrophenol in Aqueous Solution</b>                               | 0.02 to 120 $\mu$ g/mL                      | 6.7 ng/mL TNP                         | <i>Anal. Chem.</i> , 2017, 89, 3001–3008                  |
| <b>A Label-Free and Sensitive Photoluminescence Sensing Platform based on Long Persistent Luminescence Nanoparticles for Determination of Antibiotic and 2,4,6-Trinitrophenol</b> | 50 nM-5 $\mu$ M<br>0.025 to 2.5 $\mu$ M     | 10 nM TNP<br>5 nM antibiotic          | This work                                                 |

**Table S2: Recovery experiments of TNP in water samples.**

| Sample | Added concentration of TNP (nmol) | Found (nmol)      | Recovery (%) | Average (%) |
|--------|-----------------------------------|-------------------|--------------|-------------|
| 1      | 100                               | 100.7[a]±2.58[b]  | 107          | 102.5       |
| 2      | 250                               | 250.4[a]±4.66[b]  | 100.4        |             |
| 3      | 2500                              | 2500.2[a]±2.04[b] | 100.2        |             |

[a] Mean value of four determinations. [b] Standard deviation.
